# Supplementary material for: Engineered CRISPR–Cas12a variants with increased activities and improved targeting ranges for gene, epigenetic and base editing
Source: Springer Nature journal article supplement (doi:10.1038/s41587-018-0011-0), 2019-02-11
Supplement: MOESM4 [file 41587_2018_11_MOESM4_ESM.xlsx]

## Sheet: PAM tiers
	mean PAMDA k			mean activity in human cells (T7E1)			PAM tier classification
PAM	enAsCas12a	enRVR	enRR	enAsCas12a	enRVR	enRR	enAsCas12a	enRVR	enRR
AAAA	0.00149	0.00125	0.00147	na	na	na	-	-	-
AAAC	0.00185	0.00158	0.00184	na	na	na	-	-	-
AAAG	0.00194	0.00176	0.00136	na	na	na	-	-	-
AAAT	0.00211	0.00101	0.00204	na	na	na	-	-	-
AACA	0.00424	0.00283	0.00246	na	na	na	-	-	-
AACC	0.00492	0.00394	0.0038	13.9	na	na	-	-	-
AACG	0.00164	0.00181	0.00134	na	na	na	-	-	-
AACT	0.00138	0.00237	0.00136	na	na	na	-	-	-
AAGA	0.00103	0.00337	0.00218	na	na	na	-	-	-
AAGC	0.00157	0.00257	0.0009	na	na	na	-	-	-
AAGG	0.00221	0.00363	0.00236	na	na	na	-	-	-
AAGT	0.00088	0.00245	0.00145	na	na	na	-	-	-
AATA	0.00731	0.02338	0.00183	8.38	na	na	-	-	-
AATC	0.00528	0.01982	0.00206	3.38	na	na	-	-	-
AATG	0.00267	0.01446	0.00166	na	na	na	-	-	-
AATT	0.0007	0.00133	0.00072	na	na	na	-	-	-
ACAA	0.00192	0.002	0.00177	na	na	na	-	-	-
ACAC	0.00123	0.00298	0.00175	na	na	na	-	-	-
ACAG	0.00204	0.00218	0.00157	na	na	na	-	-	-
ACAT	0.00163	0.00295	0.00208	na	na	na	-	-	-
ACCA	0.00306	0.0017	0.0149	na	na	na	-	-	-
ACCC	0.00574	0.00144	0.0597	10.98	na	na	tier 2	-	-
ACCG	0.00224	0.00202	0.01168	na	na	na	-	-	-
ACCT	0.00428	0.00168	0.00197	na	na	na	-	-	-
ACGA	0.00079	0.0021	0.00133	na	na	na	-	-	-
ACGC	0.00136	0.00323	0.00146	na	na	na	-	-	-
ACGG	0.00149	0.00366	0.00226	na	na	na	-	-	-
ACGT	0.00097	0.00141	0.00096	na	na	na	-	-	-
ACTA	0.00261	0.00283	0.00271	na	na	na	-	-	-
ACTC	0.00234	0.00339	0.00203	na	na	na	-	-	-
ACTG	0.00376	0.00223	0.00293	na	na	na	-	-	-
ACTT	0.00118	0.00164	0.00174	na	na	na	-	-	-
AGAA	0.00117	0.00247	0.00119	na	na	na	-	-	-
AGAC	0.00079	0.00229	0.00182	na	na	na	-	-	-
AGAG	0.00278	0.00397	0.00139	na	na	na	-	-	-
AGAT	0.0015	0.00286	0.00173	na	na	na	-	-	-
AGCA	0.00293	0.00193	0.00202	na	na	na	-	-	-
AGCC	0.00686	0.00225	0.00278	11.7	na	na	tier 2	-	-
AGCG	0.00267	0.00175	0.00286	na	na	na	-	-	-
AGCT	0.00306	0.00226	0.00162	na	na	na	-	-	-
AGGA	0.00126	0.00192	0.00187	na	na	na	-	-	-
AGGC	0.0014	0.00227	0.00229	na	na	na	-	-	-
AGGG	0.00264	0.00169	0.00074	na	na	na	-	-	-
AGGT	0.00298	0.00209	0.00186	na	na	na	-	-	-
AGTA	0.00868	0.00412	0.00274	7.67	na	na	-	-	-
AGTC	0.00694	0.00231	0.0028	1.34	na	na	-	-	-
AGTG	0.00353	0.00151	0.00226	na	na	na	-	-	-
AGTT	0.00167	0.00181	0.00126	na	na	na	-	-	-
ATAA	0.00187	0.00218	0.00148	na	na	na	-	-	-
ATAC	0.00127	0.00203	0.00128	na	na	na	-	-	-
ATAG	0.00133	0.00188	0.00199	na	na	na	-	-	-
ATAT	0.0024	0.00173	0.00125	na	na	na	-	-	-
ATCA	0.00924	0.00239	0.01881	0	na	na	-	-	-
ATCC	0.02204	0.00304	0.04136	11.85	na	na	tier 2	-	-
ATCG	0.0045	0.00355	0.01257	na	na	na	-	-	-
ATCT	0.00274	0.00317	0.00235	na	na	na	-	-	-
ATGA	0.00104	0.00248	0.00166	na	na	na	-	-	-
ATGC	0.00155	0.00275	0.00191	na	na	na	-	-	-
ATGG	0.00278	0.00056	0.00187	na	na	na	-	-	-
ATGT	0.00087	0.0029	0.00234	na	na	na	-	-	-
ATTA	0.04397	0.01158	0.00663	15.35	na	na	tier 2	-	-
ATTC	0.0355	0.0088	0.00456	31.35	na	na	tier 1	-	-
ATTG	0.02164	0.00495	0.0029	14.55	na	na	tier 2	-	-
ATTT	0.0029	0.00266	0.00141	3.66	na	na	-	-	-
CAAA	0.00207	0.00236	0.00139	na	na	na	-	-	-
CAAC	0.00157	0.00183	0.00166	na	na	na	-	-	-
CAAG	0.00094	0.00171	0.00084	na	na	na	-	-	-
CAAT	0.00258	0.00403	0.00168	na	na	na	-	-	-
CACA	0.00298	0.00191	0.00289	na	na	na	-	-	-
CACC	0.00654	0.00289	0.00487	17.84	na	na	tier 2	-	-
CACG	0.00209	0.00247	0.00215	na	na	na	-	-	-
CACT	0.00099	0.00216	0.00105	na	na	na	-	-	-
CAGA	0.00254	0.00141	0.00231	na	na	na	-	-	-
CAGC	0.00186	0.00244	0.00234	na	na	na	-	-	-
CAGG	0.00245	0.00213	0.00126	na	na	na	-	-	-
CAGT	0.0027	0.00374	0.00274	na	na	na	-	-	-
CATA	0.004	0.00776	0.0024	na	na	na	-	-	-
CATC	0.00431	0.00649	0.00151	na	na	na	-	-	-
CATG	0.00261	0.00509	0.00183	na	na	na	-	-	-
CATT	0.00128	0.00362	0.00113	na	na	na	-	-	-
CCAA	0.00161	0.00169	0.00101	na	na	na	-	-	-
CCAC	0.00213	0.00278	0.00155	na	na	na	-	-	-
CCAG	0.00247	0.00284	0.00196	na	na	na	-	-	-
CCAT	0.00223	0.00236	0.00258	na	na	na	-	-	-
CCCA	0.00326	0.00256	0.01788	na	na	na	-	-	-
CCCC	0.01421	0.00018	0.06481	11.75	na	na	tier 2	-	-
CCCG	0.00269	0.00423	0.01598	na	na	na	-	-	-
CCCT	0.00234	0.00193	0.00282	na	na	na	-	-	-
CCGA	0.0025	0.00248	0.00203	na	na	na	-	-	-
CCGC	0.00217	0.00324	0.00116	na	na	na	-	-	-
CCGG	0.00155	0.00231	0.0009	na	na	na	-	-	-
CCGT	0.00187	0.00229	0.0023	na	na	na	-	-	-
CCTA	0.00173	0.00168	0.00178	na	na	na	-	-	-
CCTC	0.00095	0.00205	0.00178	na	na	na	-	-	-
CCTG	0.00098	0.00102	0.00019	na	na	na	-	-	-
CCTT	0.00195	0.00162	0.00089	na	na	na	-	-	-
CGAA	0.00281	0.00173	0.00204	na	na	na	-	-	-
CGAC	0.00257	0.00211	0.0034	na	na	na	-	-	-
CGAG	0.00287	0.00133	0.00261	na	na	na	-	-	-
CGAT	0.00153	0.00207	0.00163	na	na	na	-	-	-
CGCA	0.00526	0.00318	0.00273	0.86	na	na	-	-	-
CGCC	0.0127	0.0018	0.00523	14.6	na	na	tier 2	-	-
CGCG	0.00459	0.00227	0.00192	na	na	na	-	-	-
CGCT	0.00044	0.00243	0.00035	na	na	na	-	-	-
CGGA	0.00118	0.00145	0.00182	na	na	na	-	-	-
CGGC	0.00212	0.00179	0.00126	na	na	na	-	-	-
CGGG	0.00189	0.0022	0.00127	na	na	na	-	-	-
CGGT	0.0014	0.00183	0.00122	na	na	na	-	-	-
CGTA	0.00495	0.00268	0.0019	na	na	na	-	-	-
CGTC	0.0052	0.00247	0.00145	1.32	na	na	-	-	-
CGTG	0.00347	0.00174	0.00269	na	na	na	-	-	-
CGTT	0.00284	0.00289	0.00172	na	na	na	-	-	-
CTAA	0.00064	0.00173	0.00251	na	na	na	-	-	-
CTAC	0.00293	0.0024	0.00212	na	na	na	-	-	-
CTAG	0.00127	0.00215	0.00209	na	na	na	-	-	-
CTAT	0.00051	0.00164	0.00204	na	na	na	-	-	-
CTCA	0.01133	0.00283	0.01648	2.62	na	na	-	-	-
CTCC	0.04013	0.00353	0.04185	30.59	na	na	tier 1	-	-
CTCG	0.00499	0.00111	0.00764	na	na	na	-	-	-
CTCT	0.00387	0.00262	0.00187	na	na	na	-	-	-
CTGA	0.00108	0.00179	0.00139	na	na	na	-	-	-
CTGC	0.00232	0.00262	0.00204	na	na	na	-	-	-
CTGG	0.0012	0.00297	0.00188	na	na	na	-	-	-
CTGT	0.00278	0.00267	0.00193	na	na	na	-	-	-
CTTA	0.0394	0.00943	0.00345	21.76	na	na	tier 1	-	-
CTTC	0.03164	0.00335	0.00339	29.26	na	na	tier 1	-	-
CTTG	0.01397	0.00459	0.00147	20.41	na	na	tier 1	-	-
CTTT	0.00258	0.00242	0.00192	2.34	na	na	-	-	-
GAAA	0.0018	0.00257	0.0014	na	na	na	-	-	-
GAAC	0.0023	0.00199	0.00185	na	na	na	-	-	-
GAAG	0.00237	0.00141	0.00122	na	na	na	-	-	-
GAAT	0.00151	0.001	0.0017	na	na	na	-	-	-
GACA	0.00251	0.00483	0.00189	na	na	na	-	-	-
GACC	0.00264	0.00363	0.00241	na	na	na	-	-	-
GACG	0.00098	0.00454	0.00159	na	na	na	-	-	-
GACT	0.00268	0.00436	0.00258	na	na	na	-	-	-
GAGA	0.002	0.00261	0.00204	na	na	na	-	-	-
GAGC	0.00308	0.00212	0.00092	na	na	na	-	-	-
GAGG	0.00159	0.00223	0.00189	na	na	na	-	-	-
GAGT	0.00203	0.003	0.00215	na	na	na	-	-	-
GATA	0.00316	0.03108	0.00206	na	na	na	-	-	-
GATC	0.0021	0.02618	0.00349	na	na	na	-	-	-
GATG	0.00294	0.01796	0.00144	na	na	na	-	-	-
GATT	0.00265	0.00164	0.00111	na	na	na	-	-	-
GCAA	0.0012	0.00208	0.00186	na	na	na	-	-	-
GCAC	0.0021	0.00324	0.00177	na	na	na	-	-	-
GCAG	0.00167	0.0028	0.00165	na	na	na	-	-	-
GCAT	0.00102	0.00193	0.0008	na	na	na	-	-	-
GCCA	0.00187	0.00173	0.01493	na	na	na	-	-	-
GCCC	0.00426	0.00186	0.05839	na	na	na	-	-	-
GCCG	0.00305	0.00308	0.01117	na	na	na	-	-	-
GCCT	0.0021	0.00345	0.00329	na	na	na	-	-	-
GCGA	0.0014	0.00372	0.00119	na	na	na	-	-	-
GCGC	0.00187	0.00245	0.00146	na	na	na	-	-	-
GCGG	0.00147	0.00193	0.00186	na	na	na	-	-	-
GCGT	0.00265	0.00223	0.00129	na	na	na	-	-	-
GCTA	0.00238	0.00374	0.00224	na	na	na	-	-	-
GCTC	0.00288	0.00305	0.00251	na	na	na	-	-	-
GCTG	0.00137	0.00343	0.00189	na	na	na	-	-	-
GCTT	0.00291	0.00371	0.00228	na	na	na	-	-	-
GGAA	0.00194	0.00338	0.00149	na	na	na	-	-	-
GGAC	0.0022	0.00218	0.0022	na	na	na	-	-	-
GGAG	0.00135	0.00239	0.00215	na	na	na	-	-	-
GGAT	0.001	0.00323	0.00189	na	na	na	-	-	-
GGCA	0.0016	0.00256	0.00263	na	na	na	-	-	-
GGCC	0.00182	0.00324	0.00066	na	na	na	-	-	-
GGCG	0.0011	0.00263	0.00165	na	na	na	-	-	-
GGCT	0.00204	0.00256	0.00307	na	na	na	-	-	-
GGGA	0.00171	0.00225	0.00181	na	na	na	-	-	-
GGGC	0.00234	0.00185	0.00198	na	na	na	-	-	-
GGGG	0.00132	0.0028	0.00213	na	na	na	-	-	-
GGGT	0.00235	0.00378	0.00272	na	na	na	-	-	-
GGTA	0.00475	0.0016	0.00225	na	na	na	-	-	-
GGTC	0.00305	0.00329	0.00153	na	na	na	-	-	-
GGTG	0.00276	0.00191	0.00236	na	na	na	-	-	-
GGTT	0.00179	0.00157	0.00137	na	na	na	-	-	-
GTAA	0.0021	0.00174	0.00188	na	na	na	-	-	-
GTAC	0.00216	0.00204	0.0019	na	na	na	-	-	-
GTAG	0.00183	0.0011	0.00207	na	na	na	-	-	-
GTAT	0.00155	0.00357	0.00177	na	na	na	-	-	-
GTCA	0.00691	0.00275	0.01808	8.18	na	na	-	-	-
GTCC	0.01645	0.00207	0.05042	12.46	na	na	tier 2	-	-
GTCG	0.00216	0.0034	0.00888	na	na	na	-	-	-
GTCT	0.00203	0.00182	0.0031	na	na	na	-	-	-
GTGA	0.0022	0.00246	0.00181	na	na	na	-	-	-
GTGC	0.00179	0.00298	0.0024	na	na	na	-	-	-
GTGG	0.00124	0.00071	0.0037	na	na	na	-	-	-
GTGT	0.00121	0.0023	0.00142	na	na	na	-	-	-
GTTA	0.03661	0.01663	0.00469	19.55	na	na	tier 2	-	-
GTTC	0.03074	0.01118	0.00373	34.76	na	na	tier 1	-	-
GTTG	0.01527	0.00537	0.00261	16.94	na	na	tier 2	-	-
GTTT	0.00091	0.00184	0.00153	4.51	na	na	-	-	-
TAAA	0.00088	0.00297	0.00157	na	na	na	-	-	-
TAAC	0.00183	0.00279	0.00139	na	na	na	-	-	-
TAAG	0.00239	0.00115	0.00201	na	na	na	-	-	-
TAAT	0.00085	0.00262	0.00094	na	na	na	-	-	-
TACA	0.01379	0.01123	0.00476	21.73	na	na	tier 1	-	-
TACC	0.02431	0.01332	0.01024	2.63	na	na	-	-	-
TACG	0.00387	0.00357	0.00251	na	na	na	-	-	-
TACT	0.00376	0.00165	0.00235	na	na	na	-	-	-
TAGA	0.00202	0.00357	0.00161	na	na	na	-	-	-
TAGC	0.00144	0.00296	0.00161	na	na	na	-	-	-
TAGG	0.00144	0.00184	0.00198	na	na	na	-	-	-
TAGT	0.00218	0.00251	0.00318	na	na	na	-	-	-
TATA	0.03517	0.05829	0.00219	23.52	46.51	na	tier 1	tier 1	-
TATC	0.02643	0.0567	0.00127	22.6	38.85	na	tier 1	tier 1	-
TATG	0.01152	0.04632	0.0013	14.07	36.6	na	tier 2	tier 1	-
TATT	0.00224	0.01	0.00152	7.6	27.19	na	-	tier 2	-
TCAA	0.00196	0.00211	0.0015	na	na	na	-	-	-
TCAC	0.00173	0.00293	0.00211	na	na	na	-	-	-
TCAG	0.00262	0.0027	0.0008	na	na	na	-	-	-
TCAT	0.00134	0.00273	0.0015	na	na	na	-	-	-
TCCA	0.00497	0.00245	0.05556	9.11	na	26.83	-	-	tier 1
TCCC	0.03126	0.00418	0.05985	23.94	na	41.35	tier 1	-	tier 1
TCCG	0.00327	0.00262	0.04928	3.62	na	21.96	-	-	tier 1
TCCT	0.00377	0.00193	0.01712	12.05	na	31.39	-	-	tier 1
TCGA	0.00106	0.0014	0.00201	na	na	na	-	-	-
TCGC	0.00512	0.00254	0.00261	na	na	na	-	-	-
TCGG	0.00209	0.00385	0.00166	na	na	na	-	-	-
TCGT	0.00214	0.00273	0.00243	na	na	na	-	-	-
TCTA	0.00321	0.00231	0.01693	na	na	na	-	-	-
TCTC	0.00348	0.00287	0.02065	na	na	na	-	-	-
TCTG	0.00167	0.00391	0.00388	na	na	na	-	-	-
TCTT	0.00231	0.00188	0.00223	na	na	na	-	-	-
TGAA	0.0024	0.00319	0.00222	na	na	na	-	-	-
TGAC	0.00264	0.00342	0.00143	na	na	na	-	-	-
TGAG	0.00119	0.00372	0.00138	na	na	na	-	-	-
TGAT	0.00168	0.00224	0.0011	na	na	na	-	-	-
TGCA	0.00715	0.00363	0.00319	7.55	na	na	-	-	-
TGCC	0.01643	0.00326	0.00309	11.54	na	na	tier 2	-	-
TGCG	0.00309	0.00244	0.00309	na	na	na	-	-	-
TGCT	0.00158	0.00244	0.00243	na	na	na	-	-	-
TGGA	0.00184	0.00195	0.0016	na	na	na	-	-	-
TGGC	0.00238	0.00149	0.00212	na	na	na	-	-	-
TGGG	0.00159	0.00316	0.00215	na	na	na	-	-	-
TGGT	0.00188	0.00482	0.00132	na	na	na	-	-	-
TGTA	0.02394	0.00257	0.00255	17.37	na	na	tier 2	-	-
TGTC	0.02534	0.00349	0.00254	13.24	na	na	tier 2	-	-
TGTG	0.00748	0.00212	0.00186	17.91	na	na	tier 2	-	-
TGTT	0.00214	0.00313	0.00179	na	na	na	-	-	-
TTAA	0.00266	0.00301	0.0032	na	na	na	-	-	-
TTAC	0.00945	0.00292	0.00376	10	na	na	-	-	-
TTAG	0.00248	0.00283	0.00226	na	na	na	-	-	-
TTAT	0.00303	0.00194	0.00262	na	na	na	-	-	-
TTCA	0.04378	0.00524	0.05258	30.04	na	32.33	tier 1	-	tier 1
TTCC	0.05724	0.00611	0.05687	40.77	na	43.38	tier 1	-	tier 1
TTCG	0.02254	0.00287	0.05608	31.56	na	40.41	tier 1	-	tier 1
TTCT	0.01856	0.00522	0.01694	21.38	na	14.12	tier 1	-	tier 2
TTGA	0.0024	0.00201	0.00149	na	na	na	-	-	-
TTGC	0.00229	0.00218	0.00508	na	na	na	-	-	-
TTGG	0.00215	0.00146	0.00136	na	na	na	-	-	-
TTGT	0.00193	0.00412	0.00164	na	na	na	-	-	-
TTTA	0.04709	0.05968	0.05788	43.81	na	na	tier 1	-	-
TTTC	0.05546	0.05504	0.05465	51.49	na	na	tier 1	-	-
TTTG	0.06859	0.03869	0.021	41.35	na	na	tier 1	-	-
TTTT	0.03	0.00394	0.00469	30.75	na	na	tier 1	-	-
				na = not assessed
